# Supplementary material
Source: Springer Nature journal article supplement (https://www.springermedizin.de/resource/supplementary/12885_2014_4763_MOESM8_ESM.pdf/9467204)

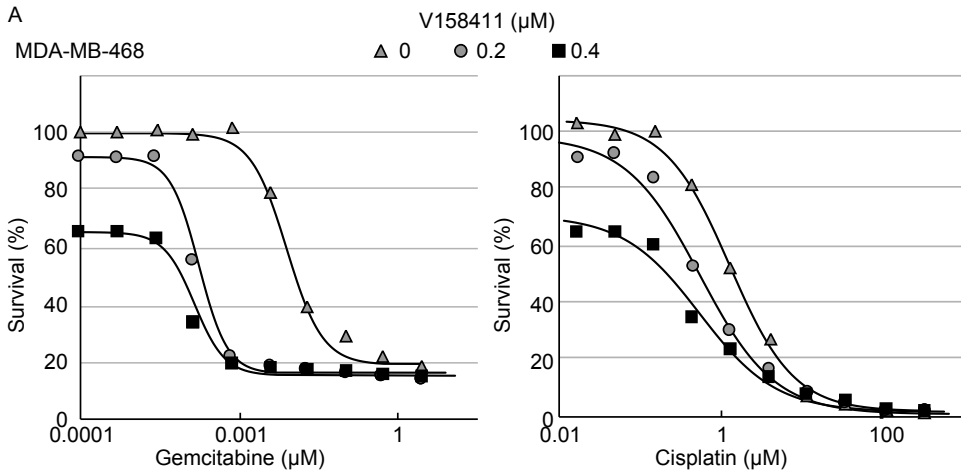

**B**

| Cell Line                            | BT474                     | MCF7 | HCC1937 | MDA-MB-157 | MDA-MB-231 | MDA-MB-468 |
|--------------------------------------|---------------------------|------|---------|------------|------------|------------|
| Tumour Type                          | Luminal                   |      |         | Basal      |            |            |
| p53 Status                           | Mut                       | WT   | Mut     | Mut        | Mut        | Mut        |
| Cytotoxic                            | V158411 ( $\mu\text{M}$ ) |      |         |            |            |            |
|                                      | Potentiation Factor       |      |         |            |            |            |
| <b>Gemcitabine (anti-metabolite)</b> | 0.1                       |      |         | 3.9        | 4.4        | 10.7       |
|                                      | 0.2                       | 9.9  |         | 7.6        | 13.4       | 29.2       |
|                                      | 0.4                       | 7.5  |         | 8.6        | 6.4        | 16.8       |
|                                      | 0.8                       | 6.6  | 1.0     |            |            |            |
| <b>Cisplatin (DNA alkylation)</b>    | 0.1                       |      |         | 4.3        | 2.1        | 2.1        |
|                                      | 0.2                       | 2.6  |         | 7.0        | 4.6        | 2.4        |
|                                      | 0.4                       | 2.5  |         | 16.0       | 6.1        | 2.6        |
|                                      | 0.8                       | 2.0  | 0.9     |            |            |            |

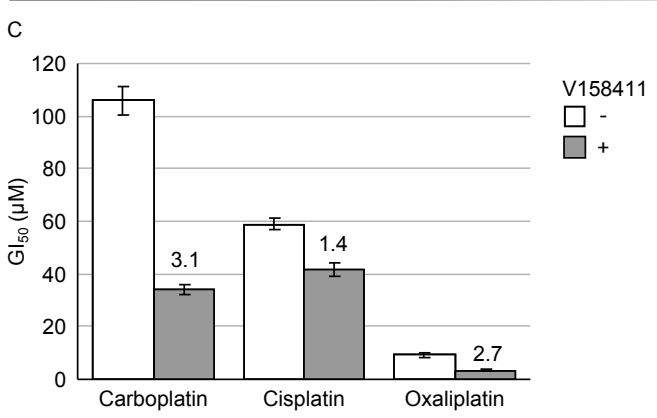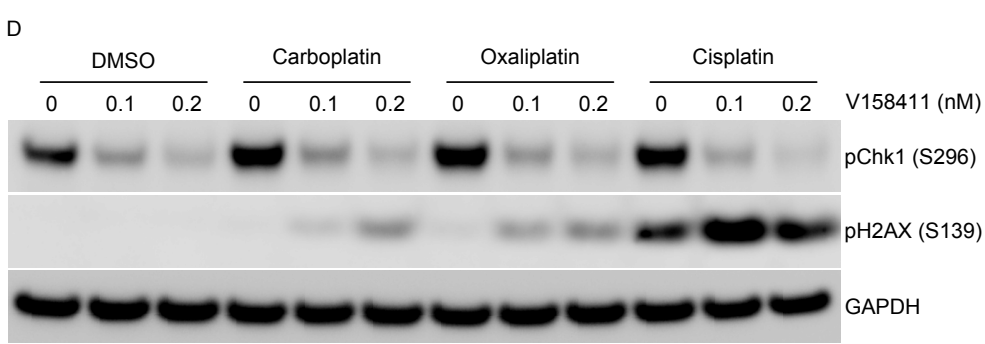

Supplement: MOESM8 [file 9467204]
